# Supplementary material
Source: ML conference proceedings conference paper supplement (https://openreview.net/forum?id=XYRPm8rAGM)

*NegativeLog – Likelihood*

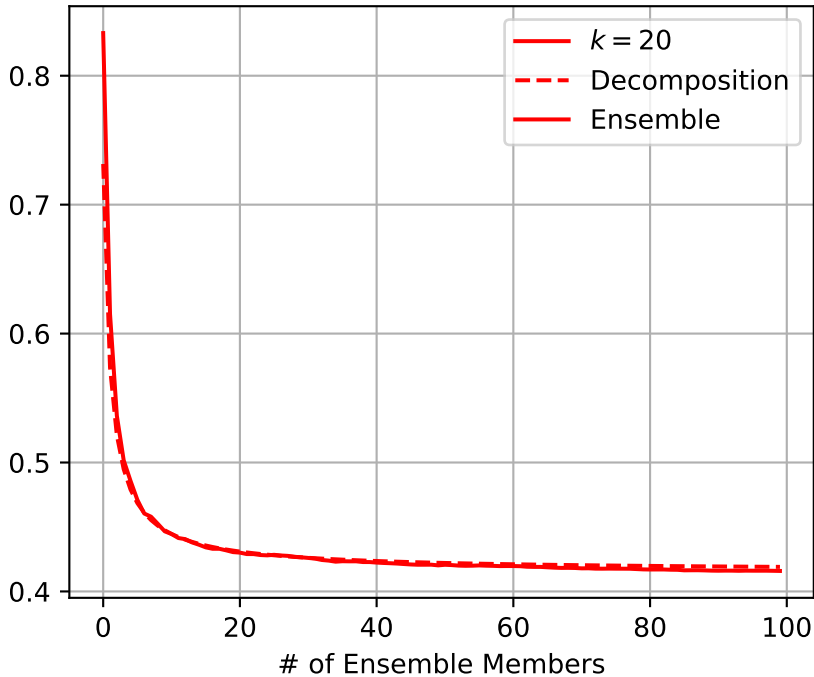

Supplement: supplementary_material [file attachment]

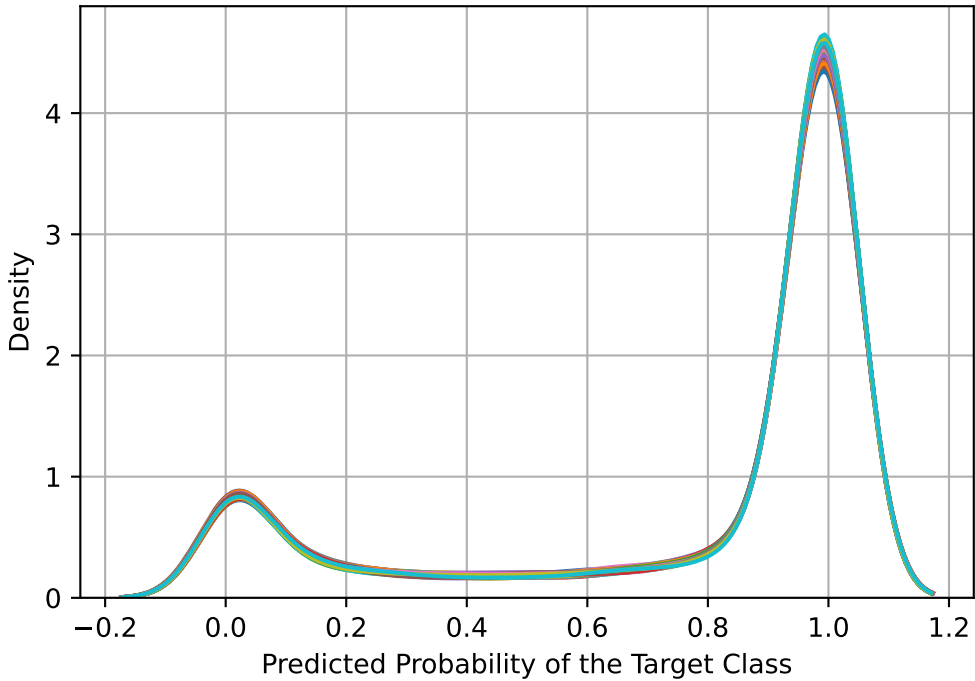

Supplement: supplementary_material [file attachment]

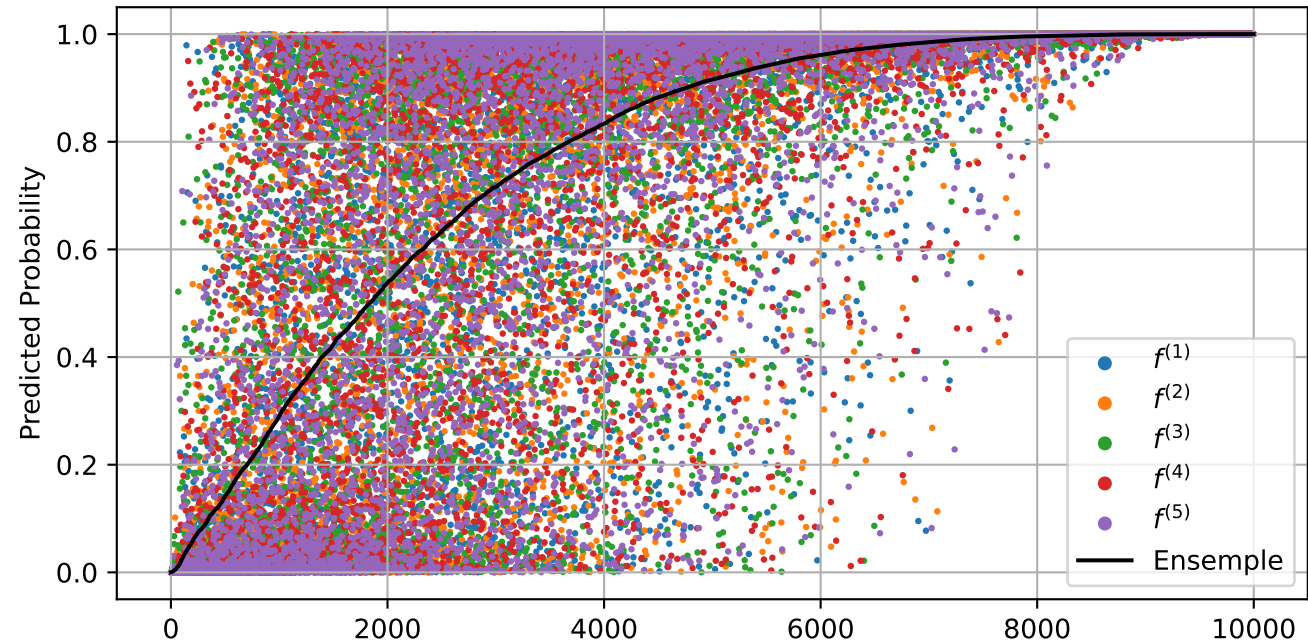

Supplement: supplementary_material [file attachment]

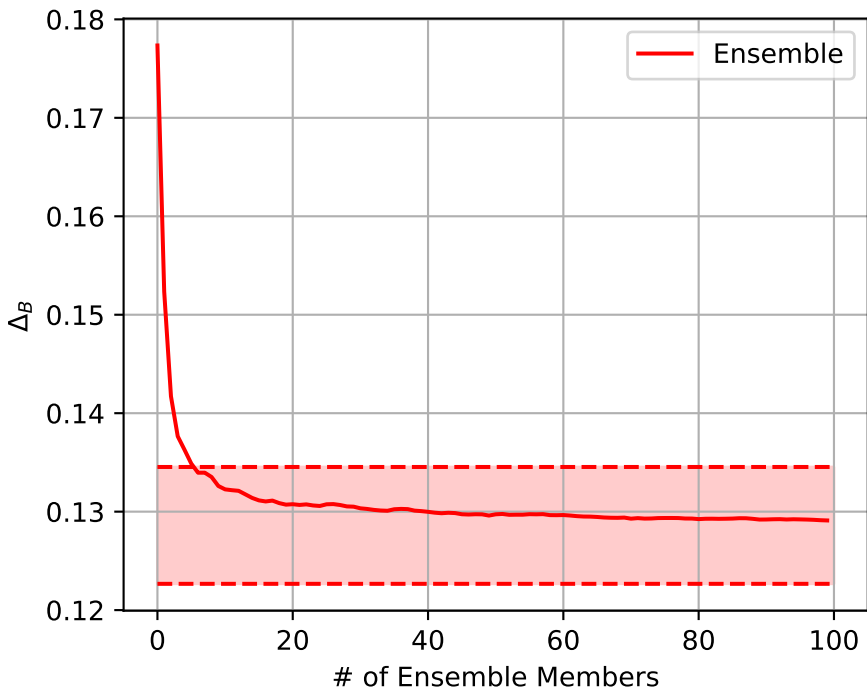

Supplement: supplementary_material [file attachment]

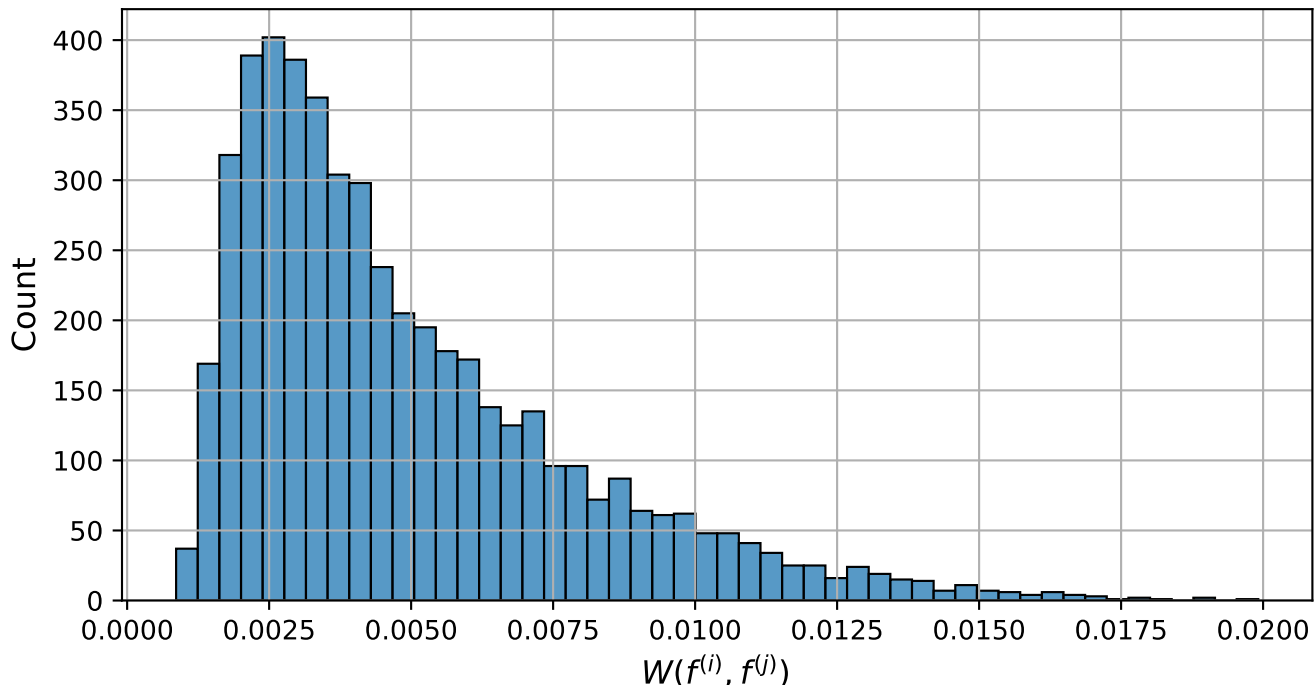

Supplement: supplementary_material [file attachment]

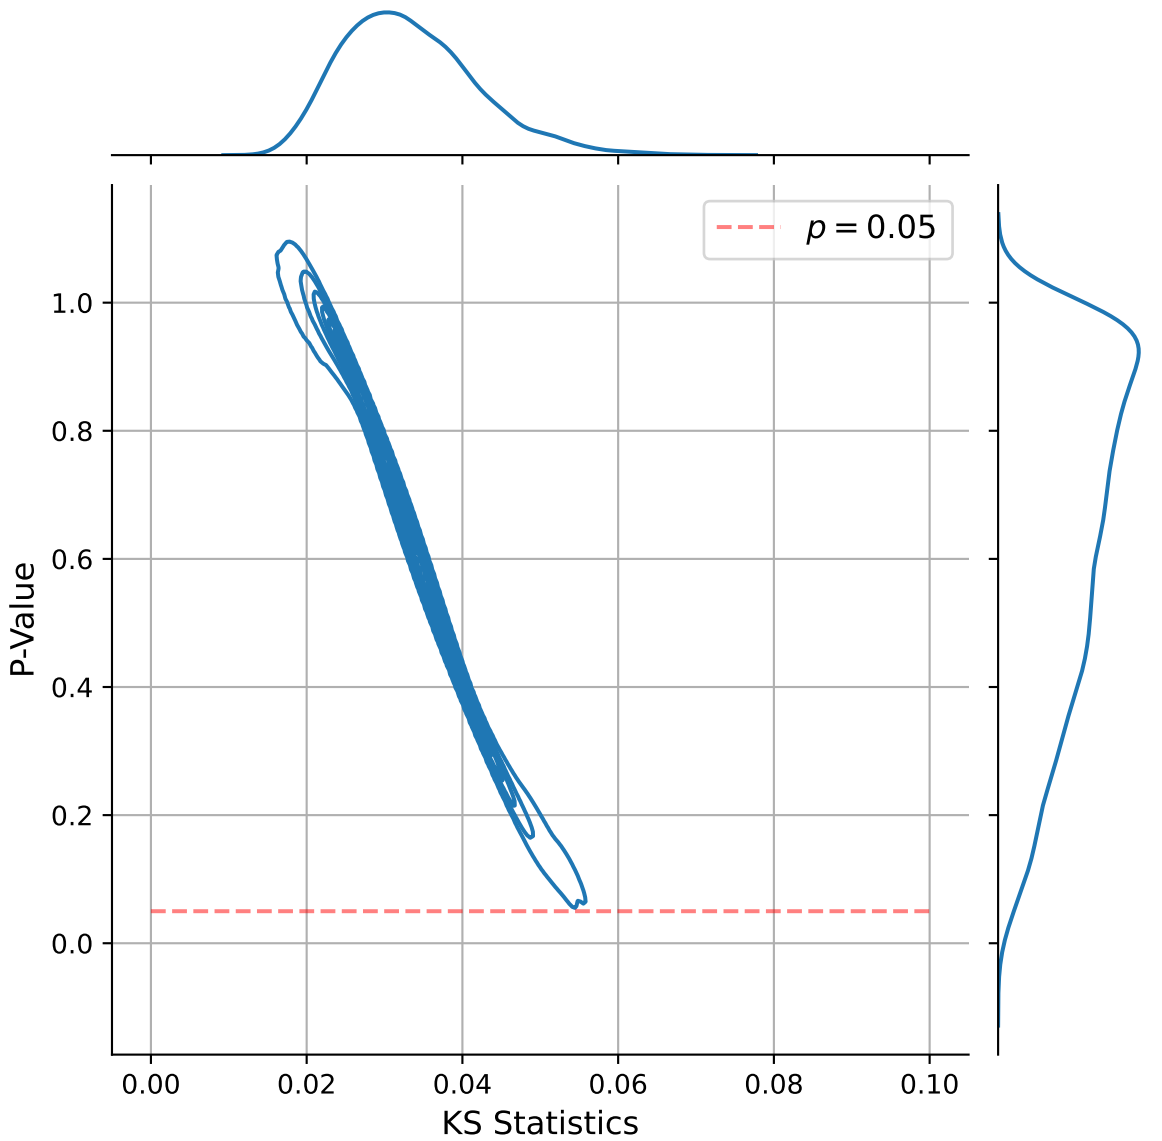

Supplement: supplementary_material [file attachment]

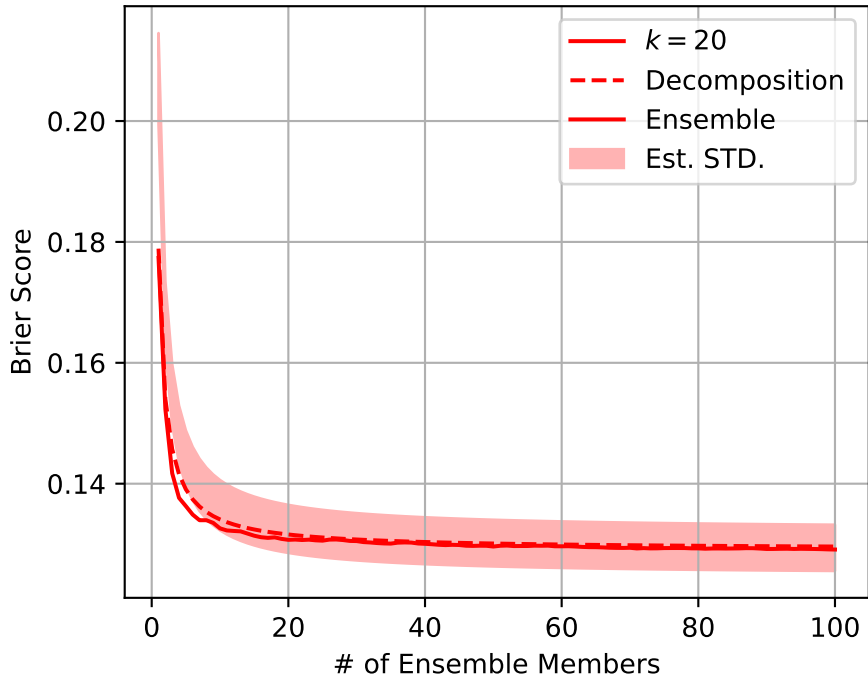

Supplement: supplementary_material [file attachment]
